# Supplementary material for: Seasonal forecasting of water table elevation in shallow unconfined aquifers with a case study in the Umbria Region, Italy
Source: Copernicus journal article supplement (doi:10.5194/egusphere-2025-3677), 2025-10-06

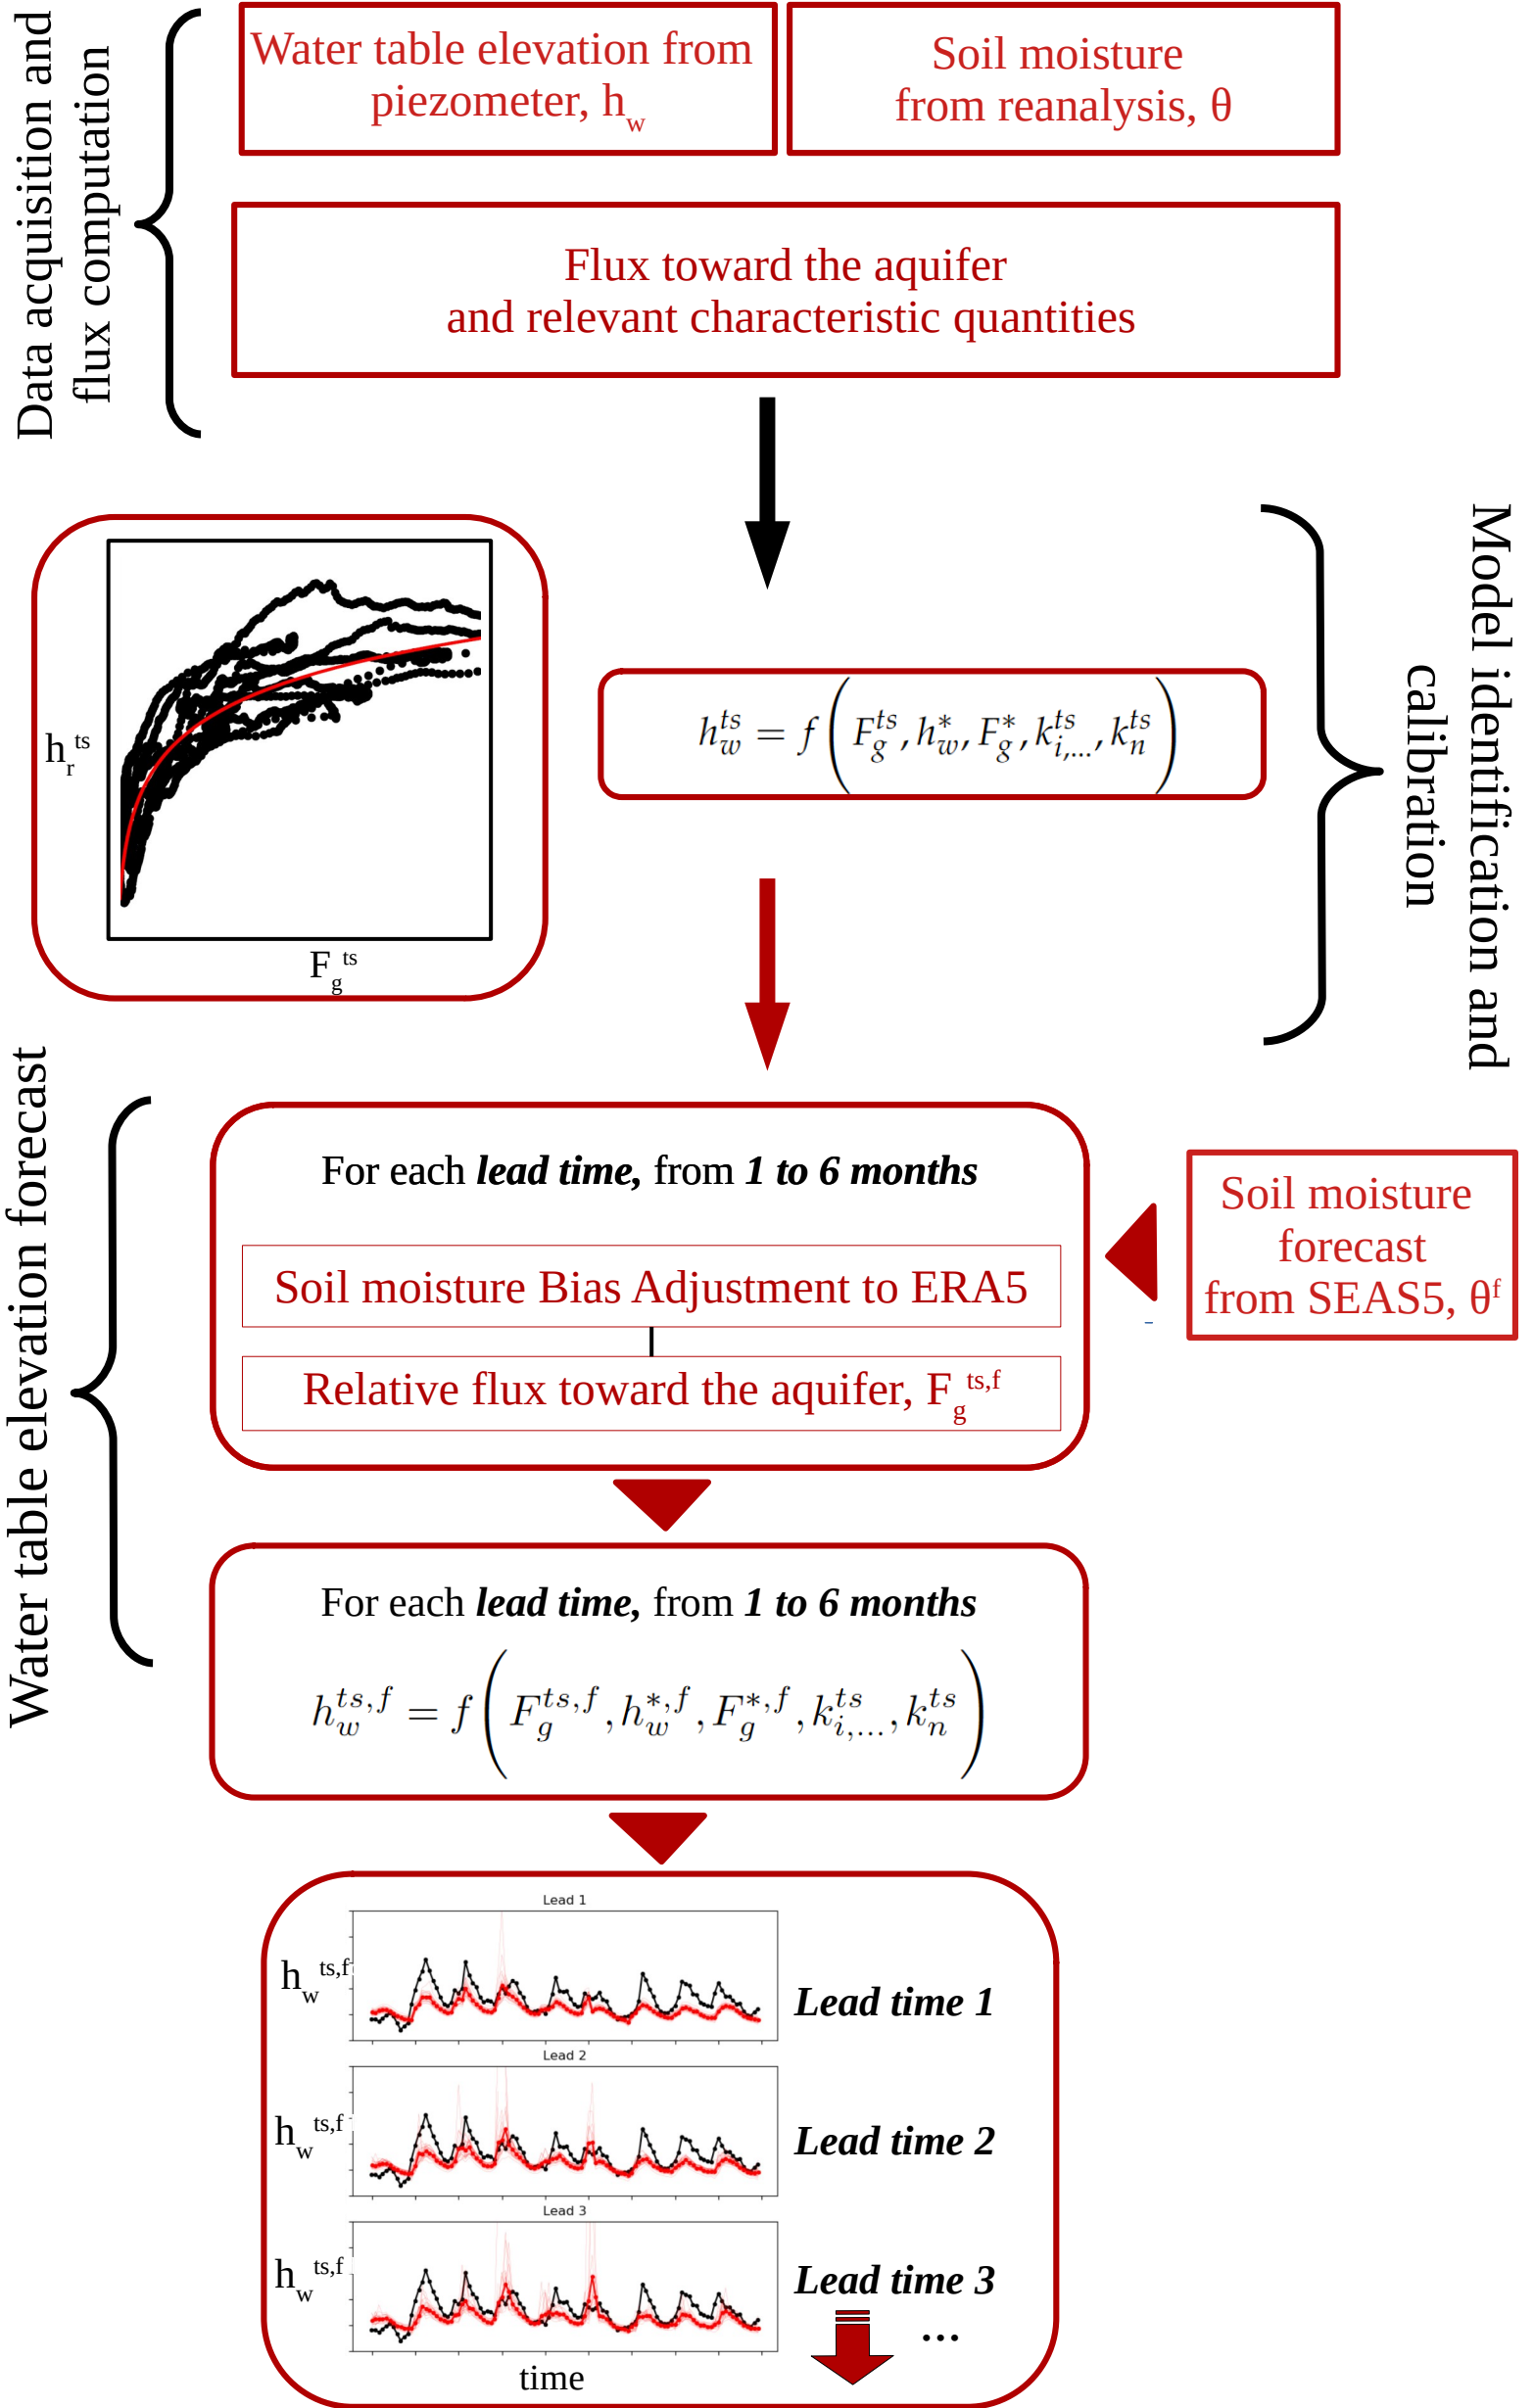

Supplement: Supplementary file [file egusphere-2025-3677-AC1-supplement.pdf]
